# Supplementary material for: Spectral Properties of Substituted Coumarins in Solution and Polymer Matrices
Source: Molecules. 2012 Mar 14;17(3):3259–76. doi: 10.3390/molecules17033259 (PMC6268095; doi:10.3390/molecules17033259)

## Supporting Information

### Spectral Properties of Substituted Coumarins in Solution and Polymer Matrices

Jana Donovalová <sup>1,\*</sup>, Marek Cigán <sup>1</sup>, Henrieta Stankovičová <sup>1</sup>, Jan Gašpar <sup>1</sup>, Martin Danko <sup>2</sup>, Anton Gáplovský <sup>1</sup> and Pavol Hrdlovič <sup>1,2</sup>

<sup>1</sup> Faculty of Natural Sciences, Institute of Chemistry, Comenius University, Mlynská dolina CH-2, SK-842 15 Bratislava, Slovak; E-Mails: [cigan@fns.uniba.sk](mailto:cigan@fns.uniba.sk) (M.C.); [stankovh@fns.uniba.sk](mailto:stankovh@fns.uniba.sk) (H.S.); [gaspar@fns.uniba.sk](mailto:gaspar@fns.uniba.sk) (J.G.); [gaplovsky@fns.uniba.sk](mailto:gaplovsky@fns.uniba.sk) (A.G.)

<sup>2</sup> Polymer Institute, Slovak Academy of Sciences, 842 36 Bratislava, Dúbravská cesta 9, Slovak; E-Mails: [upoldan@savba.sk](mailto:upoldan@savba.sk) (M.D.); [upolhrdl@savba.sk](mailto:upolhrdl@savba.sk) (P.H.)

\* Author to whom correspondence should be addressed; E-Mail: [donovalova@fns.uniba.sk](mailto:donovalova@fns.uniba.sk); Tel.: +421-2-6029-6306; Fax: +421-2-6029-6337.

**Supporting Figure 1.** Absorption spectra of carbaldehydes **1** and **5** in chloroform and methanol at  $\sim 10^{-4}$  mol dm<sup>-3</sup>.

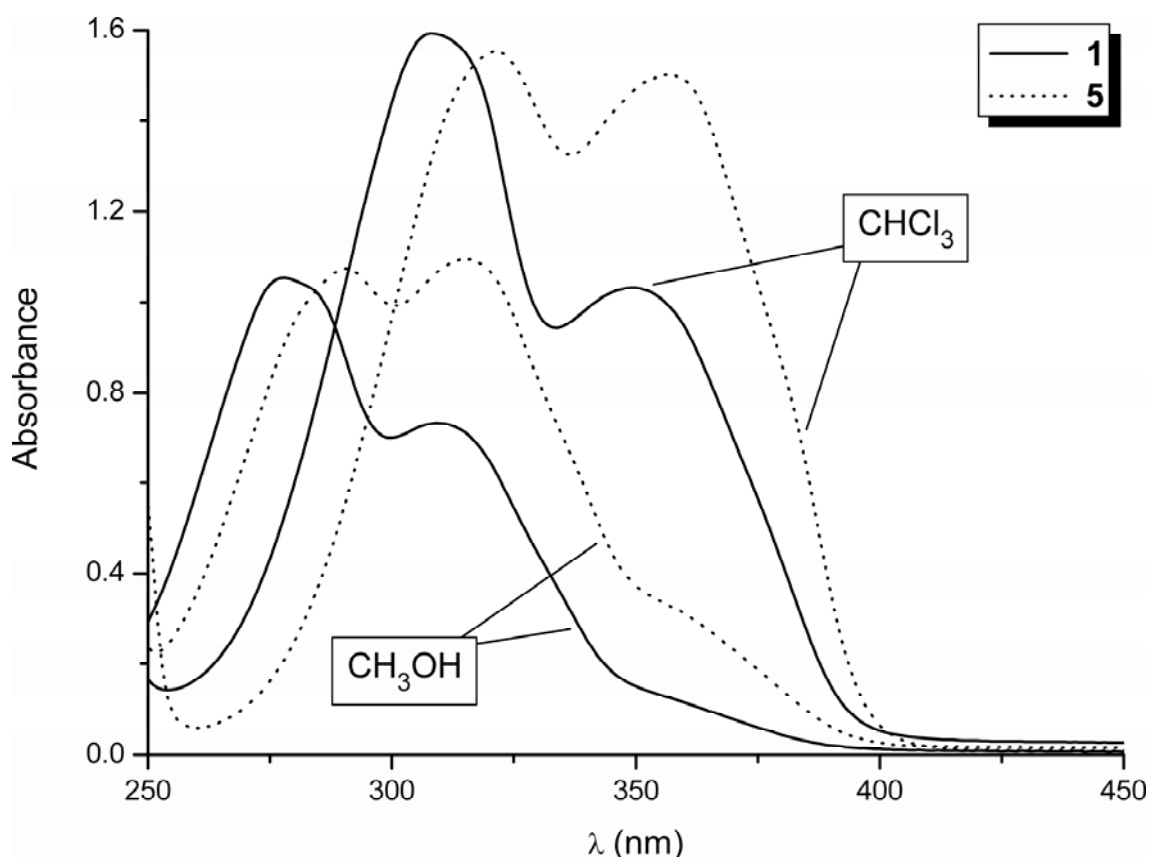

**Supporting Figure 2.** The change in chemical shift of signals for various protons of phenylsemicarbazide group for investigated 7-substituted phenylsemicarbazides **4,6,8** and the basic 7-unsubstituted phenylsemicarbazide **2**.

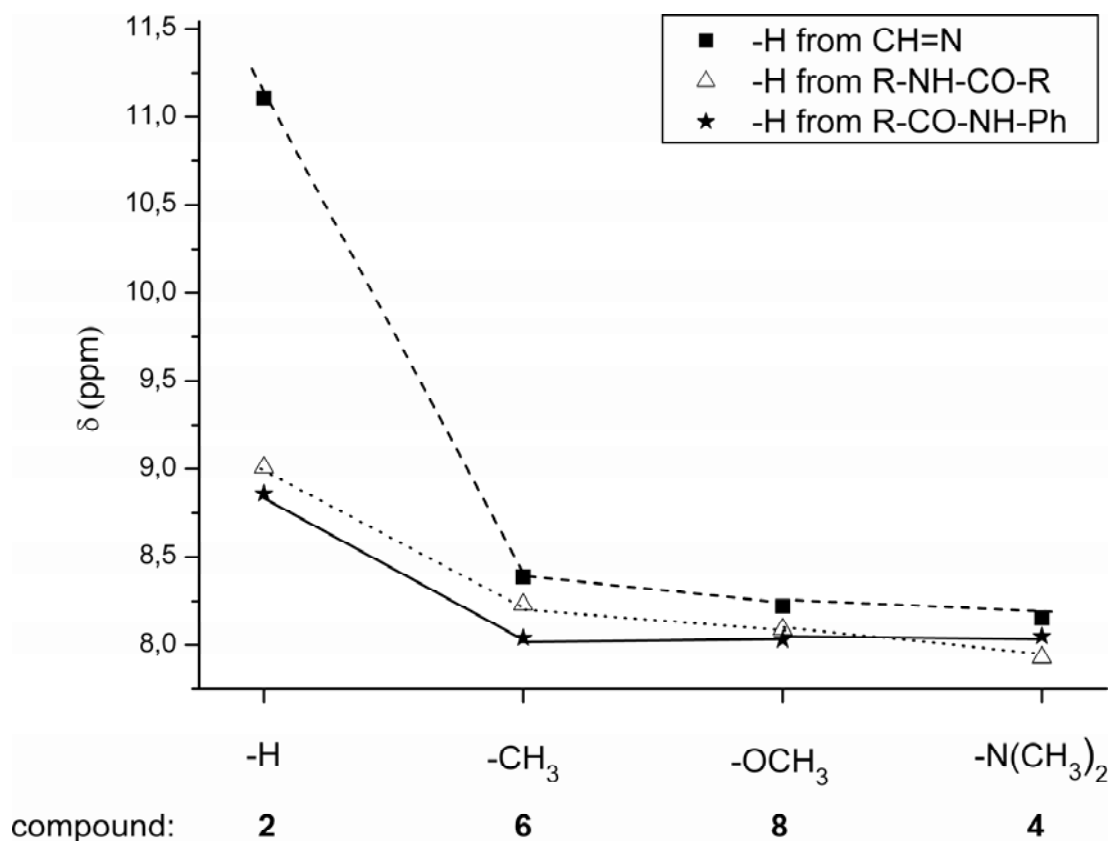

Supplement: Supplementary file 1 [file molecules-17-03259-s001.pdf]
